# Supplementary material
Source: PubMed Central journal article supplement (PMC2658727)
Supplement: NIHMS88926-supplement-2.pdf [file NIHMS88926-supplement-2.pdf]

## **Supplementary Information**

Discovering chemical modifiers of oncogene-regulated  
hematopoietic differentiation

Jing-Ruey J. Yeh, Kathleen M. Munson, Kamaleldin E. Elagib, Adam N. Goldfarb,  
David A. Sweetser, and Randall T. Peterson

## Supplementary Figure 1

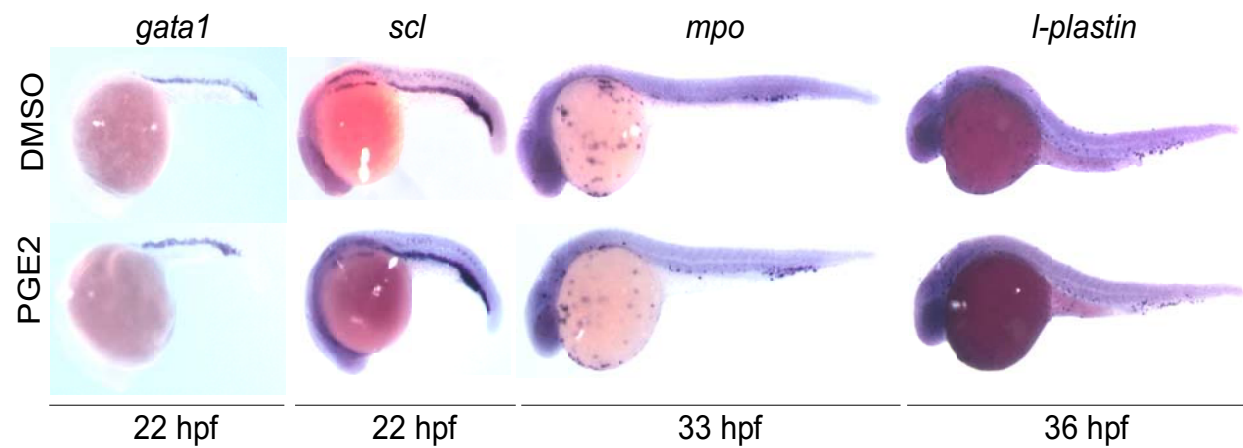

**Supplementary Figure 1. PGE2 does not affect the expression of hematopoietic genes in early zebrafish embryos.** DMSO or PGE2 (20 $\mu$ M) was added to the embryo water at 14 hpf and the embryos were harvested for *in situ* hybridization of *gata1*, *scl*, *mpo*, and *l-plastin* at the designated stages as indicated.

## Supplementary Figure 2

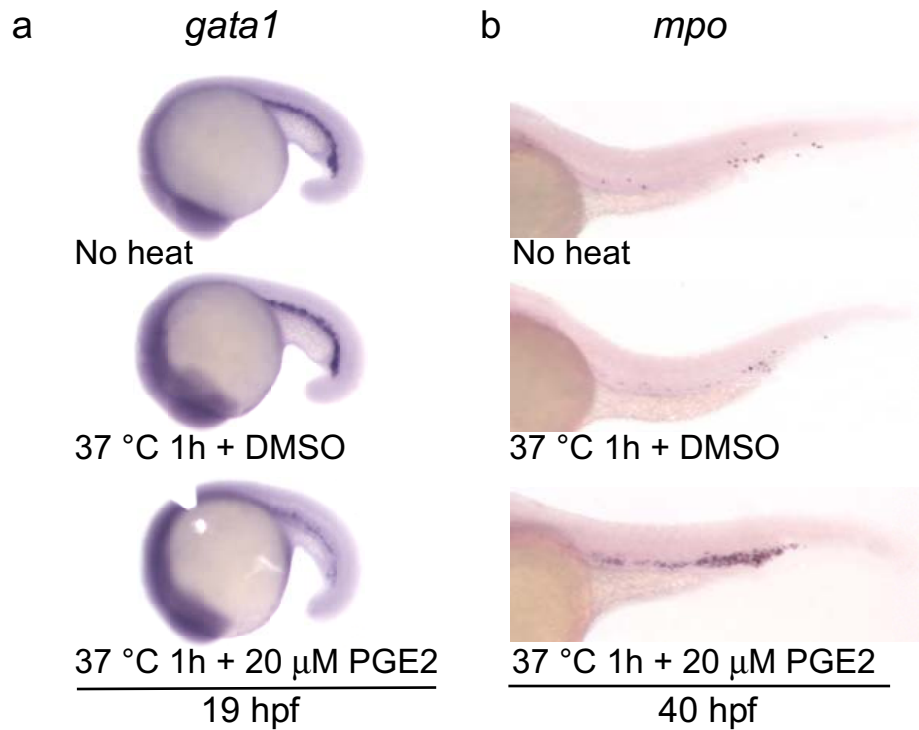

**Supplementary Figure 2. Prostaglandin E2 enhances the hematopoietic phenotype of AE in Tg(*hsp:AML1-ETO*) embryos. (a-b) *In situ* hybridization of *gata1* (a) and *mpo* (b). Tg(*hsp:AML1-ETO*) and wild-type embryos were incubated at 37 °C for one hour to induce low-level AE expression in the presence of DMSO or PGE2 and were then returned to 25-28.5 °C until the designated stages as indicated.**

### Supplementary Figure 3

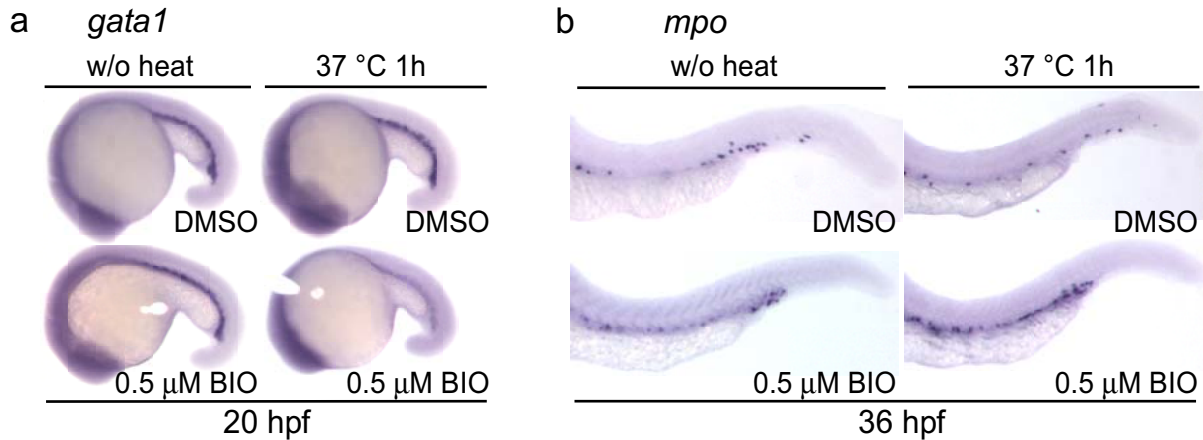

**Supplementary Figure 3. Activation of the  $\beta$ -catenin pathway augments the AE phenotype.** (a-b) *In situ* hybridization of *gata1* (a) and *mpo* (b). Addition of 0.5  $\mu$ M BIO, a GSK3 inhibitor, causes the downregulation of *gata1* and upregulation of *mpo* in the presence of low levels of AE expression (37 °C 1h), but it does not affect the expression of these genes in the absence of AE (w/o heat). Tg(*hsp:AML1-ETO*) embryos were incubated at 37 °C for 1 hour at 16-somite stage to induce AE expression (w/ heat). Under this heat shock condition, induced AE expression is not high enough to cause any visible phenotype (37 °C 1h, DMSO-treated).

Supplementary Table 1. Compounds identified in the AML1-ETO suppressor screen.

| Compound                              | Analogues of rotenone | Follow-up | AML1-ETO expressed after heat | Known biological effects/uses                                     |
|---------------------------------------|-----------------------|-----------|-------------------------------|-------------------------------------------------------------------|
| nimesulide                            |                       | √         | √                             | antiinflammatory                                                  |
| dicumarol                             |                       | √         | √                             | anticoagulant                                                     |
| bithionol                             |                       | √         | X                             | anthelmintic, antiseptic                                          |
| dichlorophene                         |                       | √         | X                             | anthelmintic                                                      |
| mundoserone                           | √                     | √         | X                             |                                                                   |
| rotenone                              | √                     | √         | X                             | acaricide, ectoparasiticide, antineoplastic, mitochondrial poison |
| b-dihydrorotenone                     | √                     |           |                               |                                                                   |
| deguelin (-)                          | √                     |           |                               | antineoplastic, antiviral                                         |
| α-toxicarol                           | √                     |           |                               |                                                                   |
| cycloheximide                         |                       |           |                               | protein synthesis inhibitor                                       |
| valproate sodium                      |                       |           |                               | anticonvulsant                                                    |
| tatarol-19-carboxylic acid (18)       |                       |           |                               |                                                                   |
| 2,4-dinitrophenol (19)                |                       |           |                               | uncouples oxidative phosphorylation                               |
| 3-acetoxypregn-16-en-12,20-dione (20) |                       |           |                               |                                                                   |
| pseudobaptigenin (21)                 |                       |           |                               |                                                                   |
